# Supplementary material for: Precision synthesis of 3-substituted urushiol analogues and the realization of their urushiol-like performance
Source: Royal Society of Chemistry journal article supplement (doi:10.1039/c9ra04981a), 2019-01-01
Supplement: c9ra04981a1.pdf [file c9ra04981a1.pdf]

## Supplementary Information

### Precision Synthesis of 3-Substituted Urushiol Analogues and the Realization of Their Urushiol-Like Performance

Zeng-Feng Wei, Xin Chen, Jiang Duan\*, Cai-Hong Mei, and Ai-Dong Zhang\*  
Key Laboratory of Pesticide & Chemical Biology of the Ministry of Education, College of  
Chemistry, Central China Normal University, Wuhan 430079, P. R. China

\*Corresponding Authors

E-mail: [adzhang@mail.ccnu.edu.cn](mailto:adzhang@mail.ccnu.edu.cn); [duanj@mail.ccnu.edu.cn](mailto:duanj@mail.ccnu.edu.cn)

Tel: +86-027-67867635. Fax: +86-027-67867141.

#### Table of Contents

|                                                                                 |            |
|---------------------------------------------------------------------------------|------------|
| 1. Fig. S1. FTIR spectra of UA0~3 -----                                         | page S2    |
| 2. Fig. S2. Cyclic voltammetry plots of UA1 and UA2. -----                      | page S2    |
| 3. Fig. S3. Intramolecular H-bonding models of urushiol and UA0~3. -----        | page S3    |
| 4. Fig. S4. ATR-FTIR spectral comparison of monomers with their coatings -----  | page S4    |
| 5. Fig. S5. TG analysis of the coatings of urushiol and urushiol Analogues----- | page S5    |
| 6. Fig. S6. <sup>1</sup> H NMR spectra of UA0~3-----                            | page S5-S7 |

1. FTIR spectra of UA0~3.

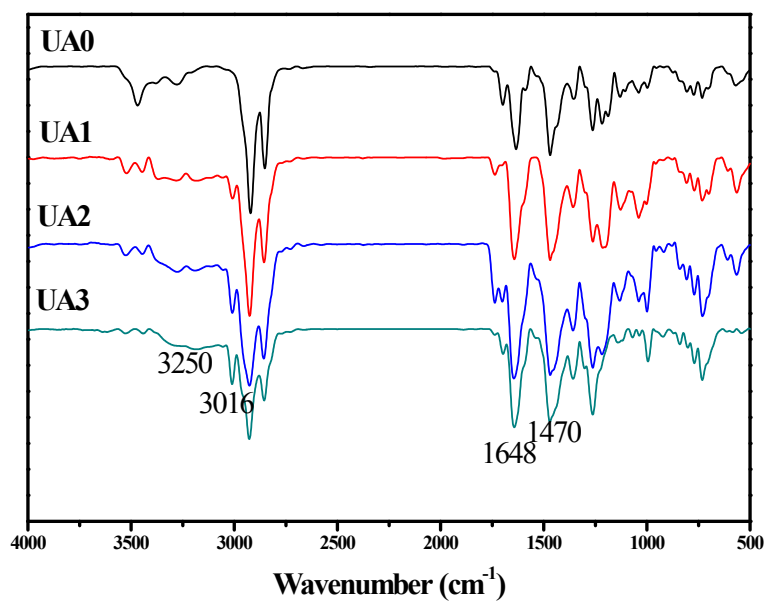

Fig. S1. FTIR spectra of UA0~3.

2. Cyclic voltammetry plots of UA1 and UA2.

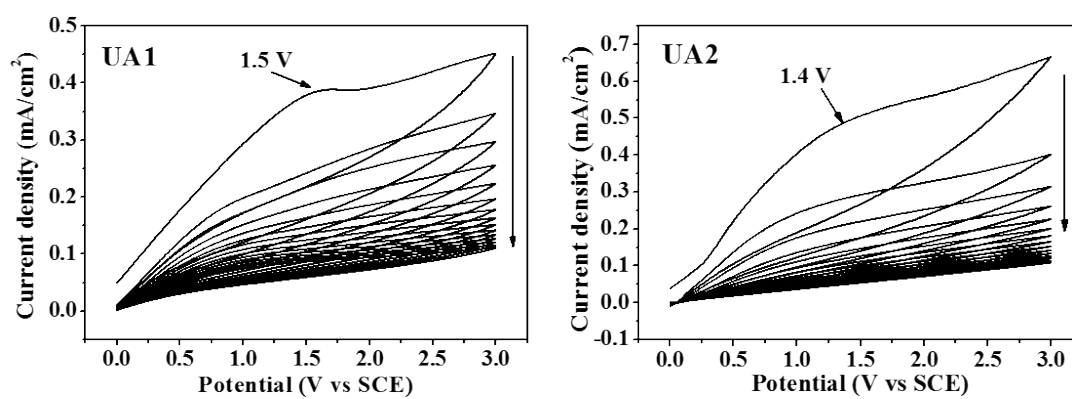

Figure S2. Cyclic voltammetry plots of UA1 and UA2 with successive 15 potential scan cycles in range of 0~3.0 V vs. SCE at scan rate 30 mV/s

3. The intramolecular H-bonding models of urushiol and UA0~3.

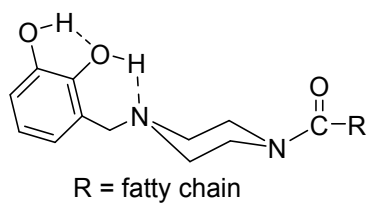

Intramolecular H-bonding model of UA0~3

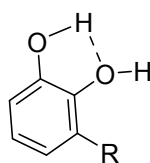

Intramolecular H-bonding model of urushiol

**Figure S3.** Intramolecular H-bonding models of urushiol and UA0~3.

4. ATR-FTIR spectral comparison of UA0~2, UAm, and urushiol with their coatings.

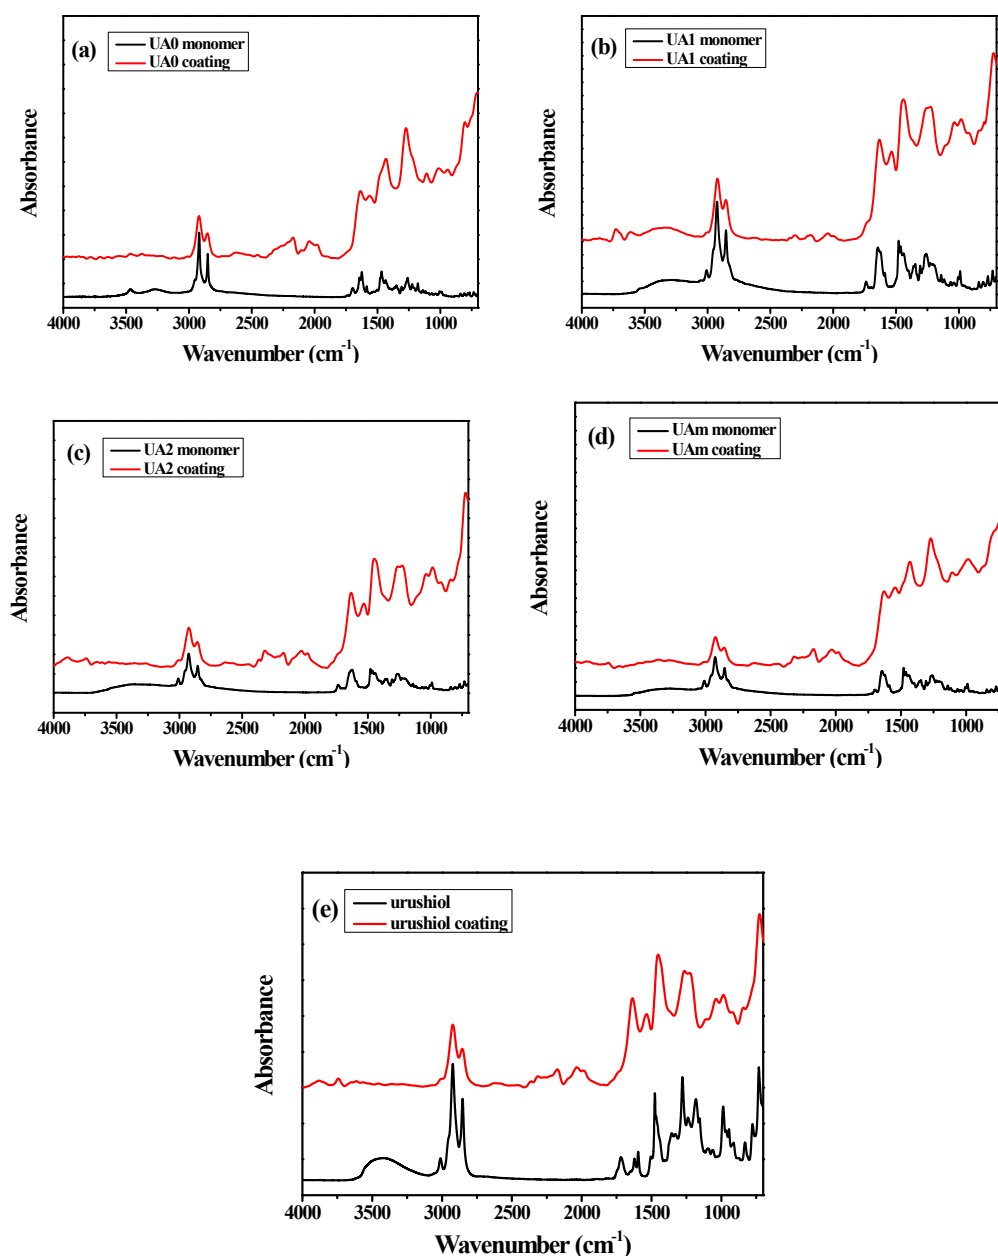

**Figure S4.** ATR-FTIR spectral comparison of UA0~2 (a-c), UAm (d), and urushiol (e) with their coatings.

5. TG analysis of the coatings of urushiol and urushiol analogues.

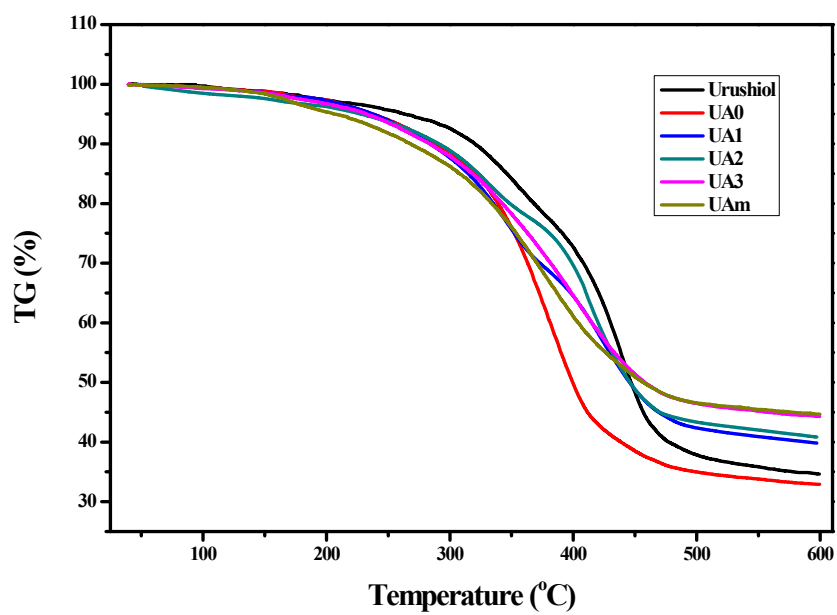

Figure S5. TG analysis of the coatings of urushiol and urushiol analogues.

6.  $^1\text{H}$  NMR spectra of UA0~3.

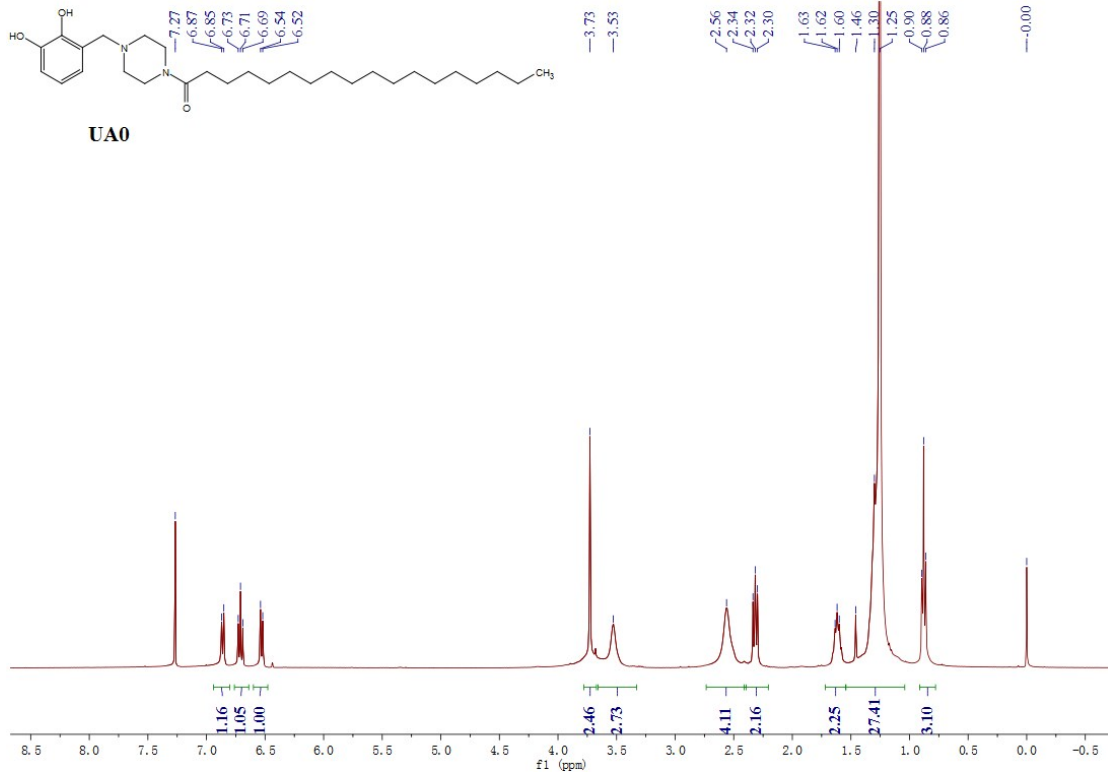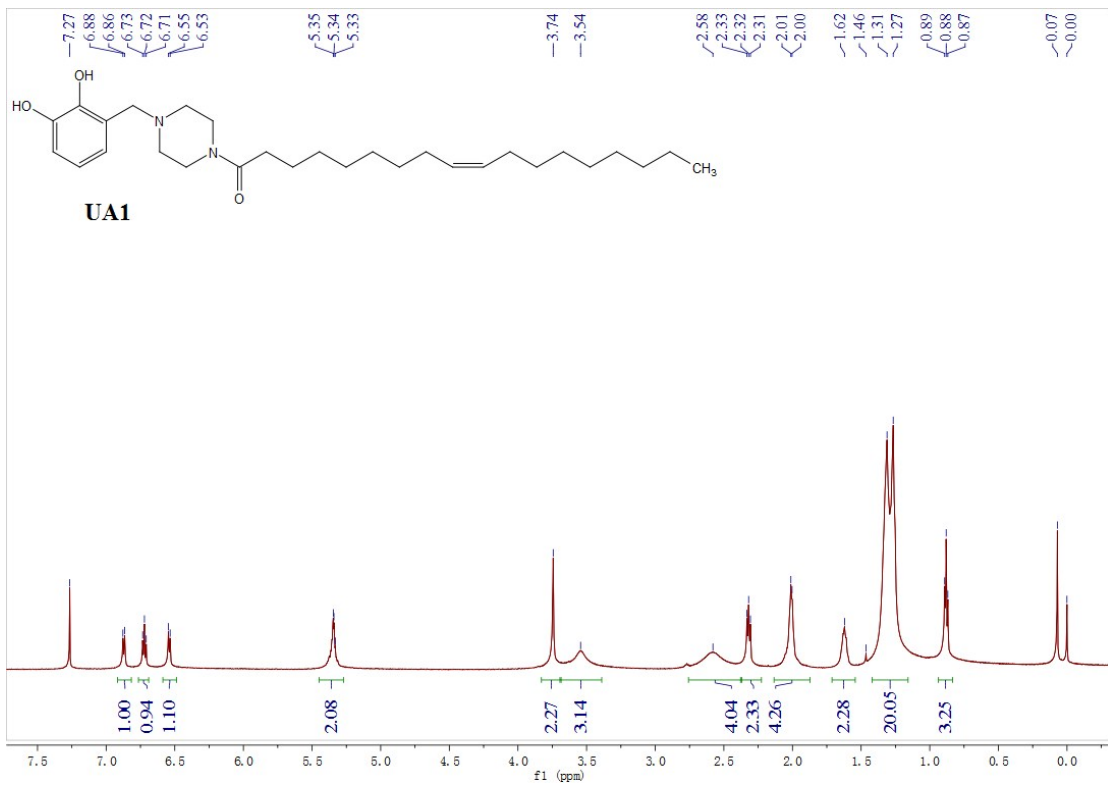

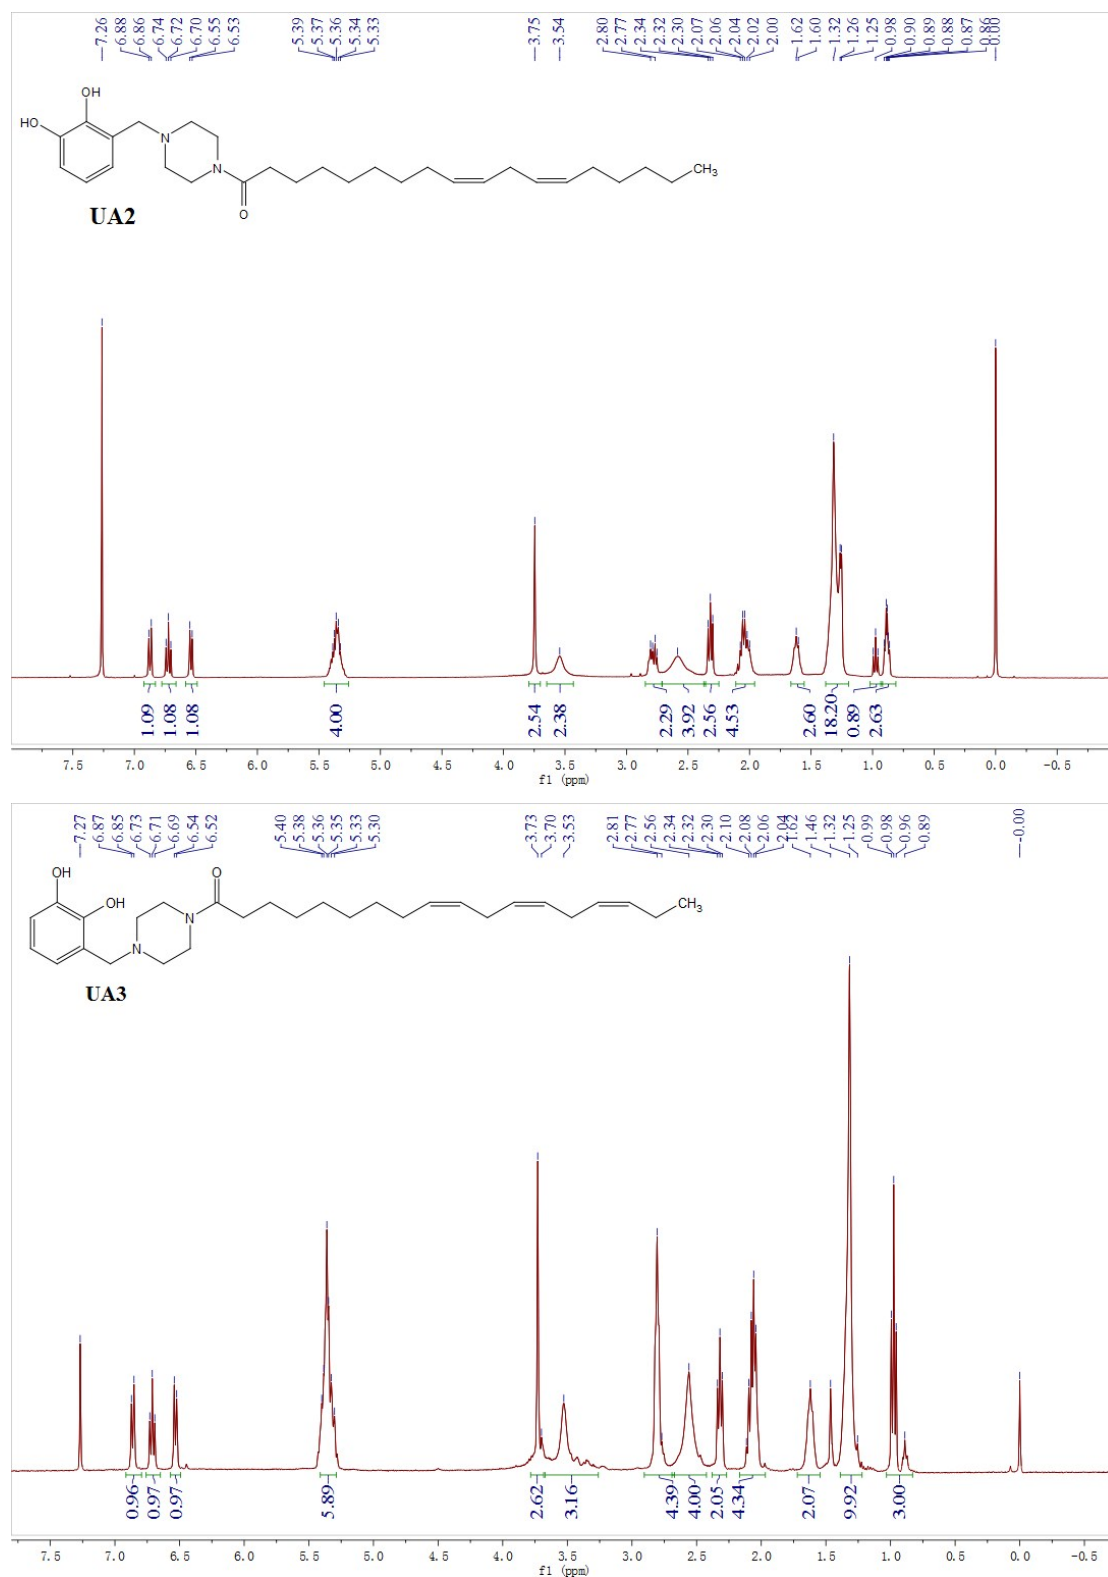

**Fig. S6.**  $^1\text{H}$  NMR spectra of UA0~3.
